# Supplementary material for: Effective Antimicrobial Solutions for Eradicating Multi-Resistant and β-Lactamase-Producing Nosocomial Gram-Negative Pathogens
Source: MDPI journal article supplement (doi:10.3390/antibiotics10111283), 2021-10-21
Supplement: s1 [file s1]

**Table S1:** Details of ESBL oligonucleotide primers used in study

| Target Gene         | Primer name | Primer Sequence        | Expected amplicon size |
|---------------------|-------------|------------------------|------------------------|
| blaTEM              | TEM-F       | CATTTCGGTGTCGCCCTTATTC | 800bp                  |
|                     | TEM-R       | CGTTCATCCATAGTTGCCTGAC |                        |
| blaSHV              | SHV-F       | AGCCGCTTGAGCAAATTAAAC  | 712bp                  |
|                     | SHV-R       | ATCCCGCAGATAAATCACCAC  |                        |
| blaCTX-M<br>group 1 | CTXM1-F     | TTAGGAAATGTGCCGCTGTA   | 688bp                  |
|                     | CTXM1-R     | CGATATCGTTGGTGGTACCAT  |                        |
| blaCTX-M<br>group 2 | CTXM2-F     | CGTTAACGGCACGATGAC     | 404bp                  |
|                     | CTXM2-R     | CGATATCGTTGGTGGTACCAT  |                        |
| blaAmpC             | AMPC-F      | CCCCGCTTATAGAGCAACAA   | 631bp                  |
|                     | AMPC-R      | TCAATGGTCGACTTCACACC   |                        |
